# Supplementary material for: Forecast of Dengue Cases in 20 Chinese Cities Based on the Deep Learning Method
Source: PubMed Central journal article supplement (PMC7014037; doi:10.3390/ijerph17020453), 2020-01-10
Supplement: ijerph-17-00453-s001.pdf [file ijerph-17-00453-s001.pdf]

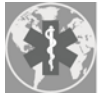

Supplementary Materials

# Forecast of Dengue Cases in 20 Chinese Cities Based on the Deep Learning Method

Jiucheng Xu <sup>1,2,3</sup>, Keqiang Xu <sup>1,3</sup>, Zhichao Li <sup>4,5</sup>, Fengxia Meng <sup>6</sup>, Taotian Tu <sup>7</sup>, Lei Xu <sup>4,5,6,\*</sup> and Qiyong Liu <sup>6,\*</sup>

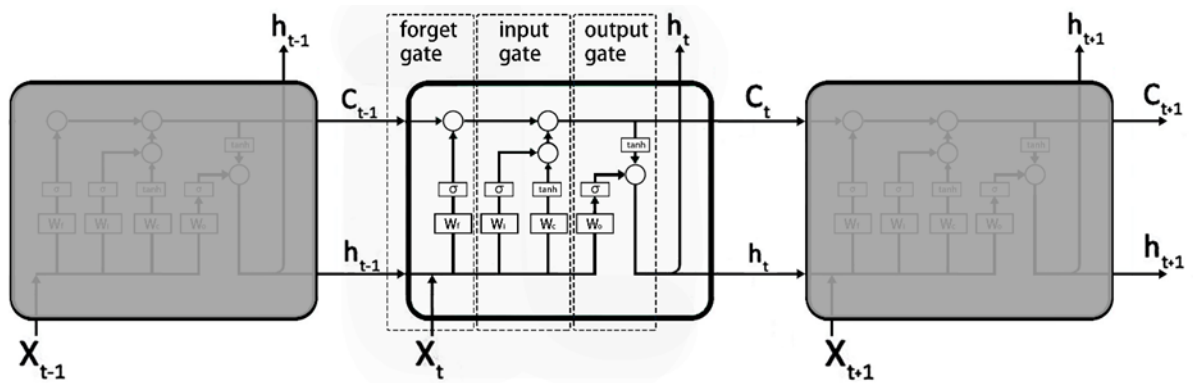

Figure 1. The memory cell structure of the long short-term memory network (LSTM) hidden layer.

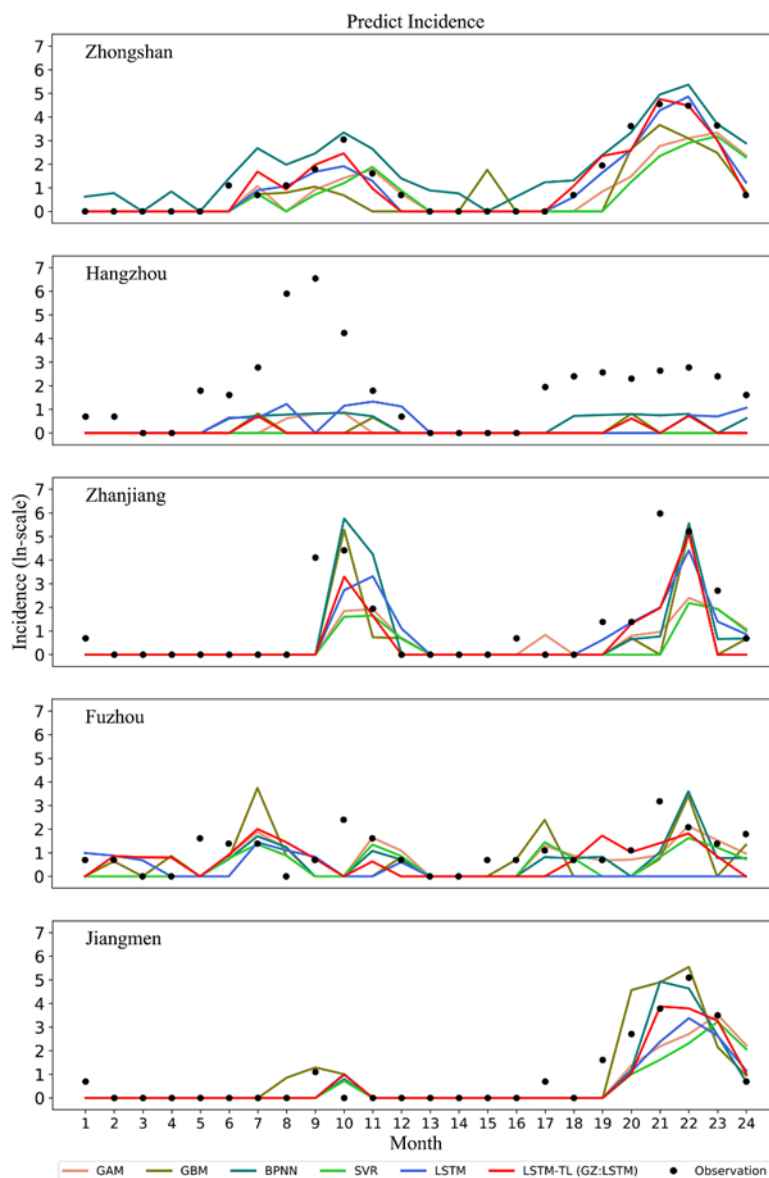

**Figure 2.** Prediction dengue cases in the last 24 months by the LSTM model, BPNN model, GBM model, GAM model, SVR model. Comparison of 24-month predictions for 2017 to 2018 in Zhongshan,.

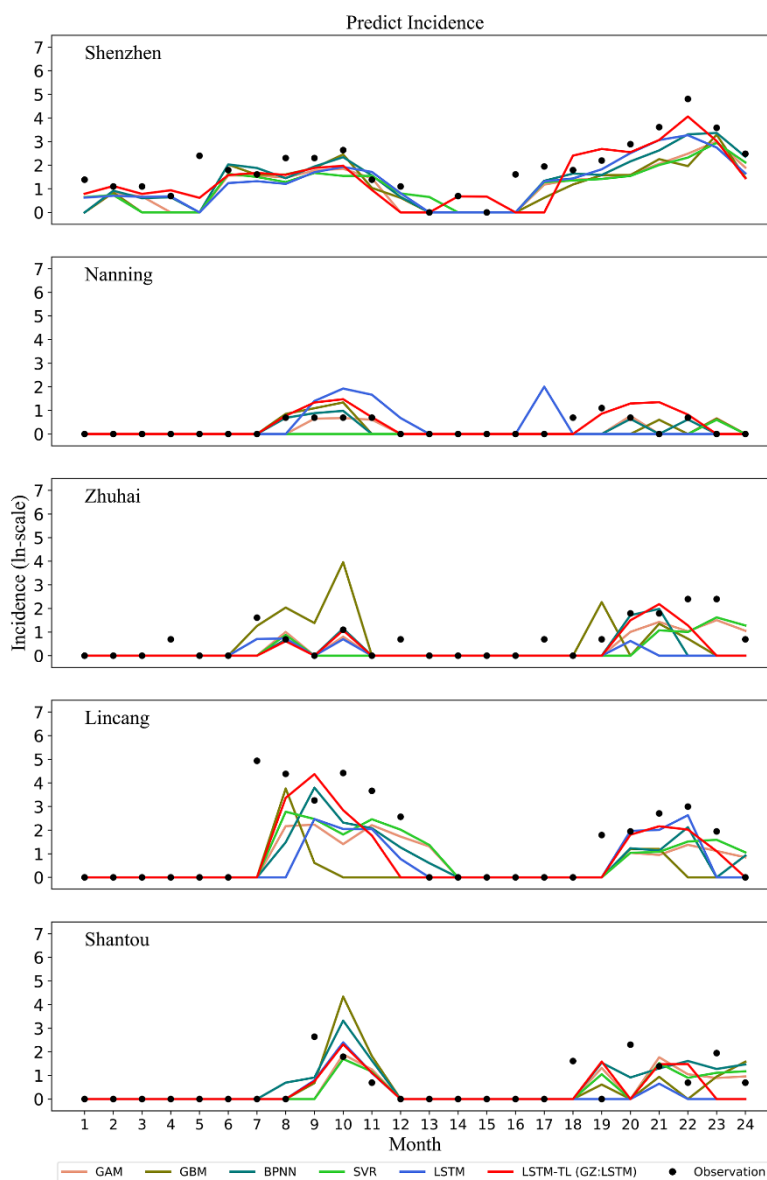

**Figure S3.** Prediction dengue cases in the last 24 months by the LSTM model, BPNN model, GBM model, GAM model, SVR model. Comparison of 24-month predictions for 2017 to 2018 in Shenzhen, Nanning, Zhuhai, Lincang, and Shantou.

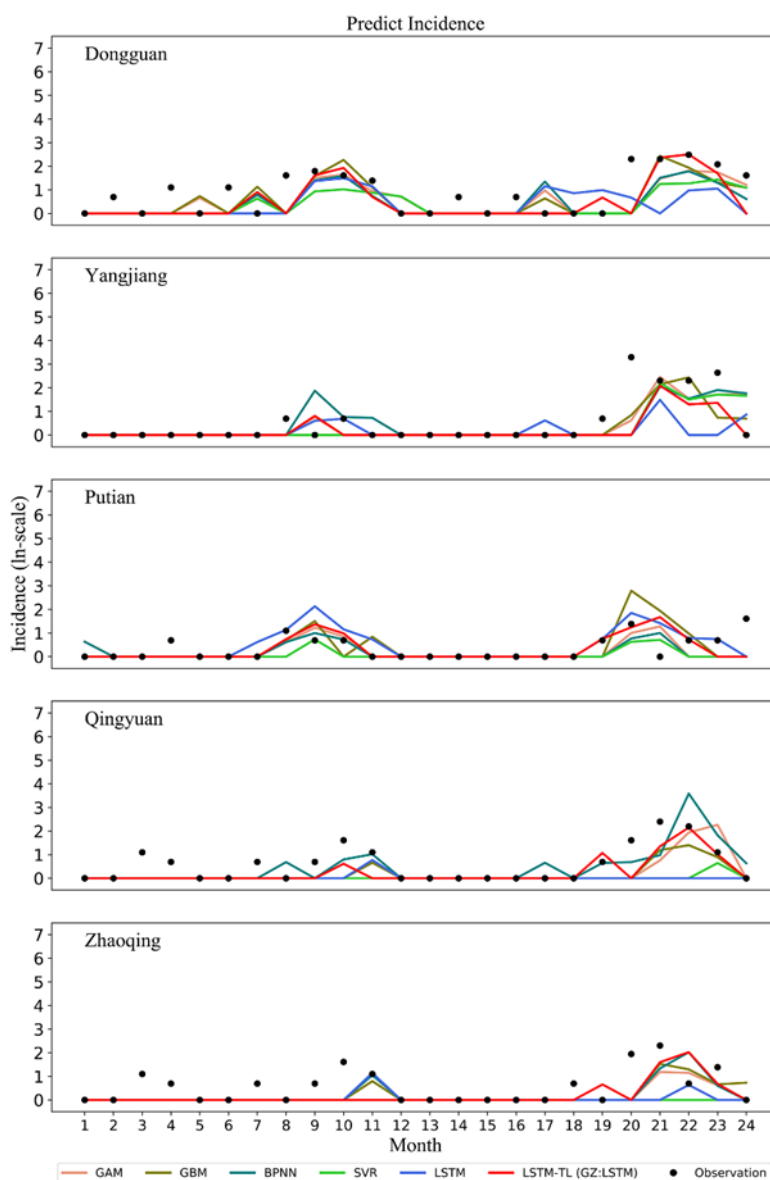

**Figure 4.** Prediction dengue cases in the last 24 months by the LSTM model, BPNN model, GBM model, GAM model, SVR model. Comparison of 24-month predictions for 2017 to 2018 in Dongguan, Yangjiang, Putian, Qingyuan, and Zhaoqing.
